# Supplementary material for: A Three-Arm, Randomized, Double-Blind, Placebo-Controlled Study to Evaluate the Safety of Lactobacillus salivarius AP-32 and Bifidobacterium animalis CP-9 Used Individually in Healthy Infants
Source: MDPI journal article supplement (doi:10.3390/nu15153426), 2023-08-02
Supplement: s1 [file s1]

Supplementary data

**Table S1.** Summary of mean and mean changes from baseline of weight on month 1 and 2 in mITT population

| Study Arm | Weight (g)      | Actual Value |        |       |        |      |      | Changes from Baseline |        |       |        |      |      |
|-----------|-----------------|--------------|--------|-------|--------|------|------|-----------------------|--------|-------|--------|------|------|
|           | Analysis Visit* | N            | Mean   | SD    | Median | Min  | Max  | N                     | Mean   | SD    | Median | Min  | Max  |
| AP-32     | Month 1         | 28           | 5403.6 | 790.9 | 5250.0 | 4100 | 7800 | 28                    | 1034.3 | 445.6 | 1050.0 | -200 | 1900 |
|           | Month 2         | 28           | 6246.4 | 835.1 | 6150.0 | 5000 | 8300 | 28                    | 1852.1 | 562.8 | 1700.0 | 900  | 3000 |
| CP-9      | Month 1         | 23           | 5369.6 | 807.6 | 5200.0 | 4200 | 7100 | 23                    | 987.0  | 419.2 | 900.0  | 200  | 1800 |
|           | Month 2         | 24           | 6275.0 | 969.6 | 6000.0 | 4500 | 8200 | 24                    | 1816.7 | 615.5 | 1850.0 | 700  | 3000 |
|           | 155             | 1            | 7600.0 | -     | -      | -    | -    | 1                     | 3600.0 | -     | -      | -    | -    |
| Placebo   | Month 1         | 31           | 5561.3 | 808.6 | 5700.0 | 4200 | 7000 | 31                    | 1132.3 | 385.9 | 1100.0 | 500  | 1800 |
|           | Month 2         | 28           | 6432.1 | 851.2 | 6500.0 | 5100 | 8200 | 28                    | 1935.7 | 510.8 | 2000.0 | 1000 | 3200 |

**Table S2.** Shift table of digestive tolerance (mITT population)

|                      |                 | <b>AP-32</b>            | <b>CP-9</b>             | <b>Placebo</b>          |
|----------------------|-----------------|-------------------------|-------------------------|-------------------------|
|                      |                 | <b>N=29<sup>#</sup></b> | <b>N=26<sup>#</sup></b> | <b>N=31<sup>#</sup></b> |
| <b>Regurgitation</b> |                 |                         |                         |                         |
| Baseline*            | Post-baseline** | n (%)                   | n (%)                   | n (%)                   |
| None                 | None            | 1 (3.4%)                | 3 (11.5%)               | 2 (6.5%)                |
|                      | Mild            | 4 (13.8%)               | 0                       | 3 (9.7%)                |
|                      | Moderate        | 1 (3.4%)                | 0                       | 0                       |
|                      | Severe          | 1 (3.4%)                | 0                       | 1 (3.2%)                |
| Mild                 | None            | 0                       | 0                       | 2 (6.5%)                |
|                      | Mild            | 15 (51.7%)              | 14 (53.8%)              | 11 (35.5%)              |
|                      | Moderate        | 2 (6.9%)                | 2 (7.7%)                | 4 (12.9%)               |
|                      | Severe          | 2 (6.9%)                | 0                       | 1 (3.2%)                |
| Moderate             | None            | 0                       | 0                       | 1 (3.2%)                |
|                      | Mild            | 0                       | 2 (7.7%)                | 2 (6.5%)                |
|                      | Moderate        | 1 (3.4%)                | 0                       | 1 (3.2%)                |
|                      | Severe          | 1 (3.4%)                | 0                       | 0                       |
| Severe               | None            | 0                       | 0                       | 0                       |
|                      | Mild            | 1 (3.4%)                | 3 (11.5%)               | 1 (3.2%)                |
|                      | Moderate        | 0                       | 0                       | 2 (6.5%)                |
|                      | Severe          | 0                       | 0                       | 0                       |
| <b>Flatulence</b>    |                 |                         |                         |                         |
| Baseline*            | Post-baseline** | n (%)                   | n (%)                   | n (%)                   |
| None                 | None            | 2 (6.9%)                | 3 (11.5%)               | 3 (9.7%)                |
|                      | Seldom          | 4 (13.8%)               | 5 (19.2%)               | 5 (16.1%)               |
|                      | Often           | 0                       | 0                       | 1 (3.2%)                |
| Seldom               | None            | 2 (6.9%)                | 2 (7.7%)                | 0                       |
|                      | Seldom          | 13 (44.8%)              | 8 (30.8%)               | 15 (48.4%)              |
|                      | Often           | 2 (6.9%)                | 2 (7.7%)                | 1 (3.2%)                |
| Often                | None            | 0                       | 0                       | 1 (3.2%)                |
|                      | Seldom          | 3 (10.3%)               | 1 (3.8%)                | 3 (9.7%)                |
|                      | Often           | 3 (10.3%)               | 3 (11.5%)               | 2 (6.5%)                |

<sup>#</sup> Number of evaluable infants

\* Baseline: the highest severity before the first dosing of study products per subject

\*\* Post-baseline: the highest severity after baseline per subject

Two infant in the CP-9 group had baseline records but missing post-baseline data.
